# Supplementary material for: Global-scale distribution of ozone in the remote troposphere from the ATom and HIPPO airborne field missions
Source: Copernicus journal article supplement (doi:10.5194/acp-20-10611-2020), 2020-09-11
Supplement: Supplementary file 1 [file acp-20-10611-2020-supplement.pdf]

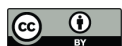

*Supplement of*

## **Global-scale distribution of ozone in the remote troposphere from the ATom and HIPPO airborne field missions**

**Ilann Bourgeois et al.**

*Correspondence to:* Ilann Bourgeois ([ilann.bourgeois@noaa.gov](mailto:ilann.bourgeois@noaa.gov)) and Jeff Peischl ([jeff.peischl@noaa.gov](mailto:jeff.peischl@noaa.gov))

The copyright of individual parts of the supplement might differ from the CC BY 4.0 License.

**Table S1** Characteristics of the different O<sub>3</sub> measurements used in this study.

|                    | Timeframe     | Spatial coverage<br>(in this study) | Altitude range<br>(in this study) | O <sub>3</sub> measurement technique | O <sub>3</sub> measurement Uncertainty |
|--------------------|---------------|-------------------------------------|-----------------------------------|--------------------------------------|----------------------------------------|
| <b>ATom</b>        | 2016–2018     | 86°S–80°N,<br>195°W–14°W            | 0.2–12 km                         | Chemiluminescence                    | 0.015 ppbv + 2%                        |
| <b>HIPPO</b>       | 2009–2011     | 55°S–87°N,<br>200°W–140°W           | 0.2–12 km                         | UV absorption                        | 5 % + 1 ppbv                           |
| <b>IAGOS</b>       | 1994–2017     | 0–80°N,<br>100°W–10°W               | 8–12 km                           | UV absorption                        | 2 ppbv + 2 %                           |
| <b>Ozonesondes</b> | Site specific | Site specific                       | 0–12 km                           | ECC sondes (KI)                      | 5–10 %                                 |

**Table S2** Characteristics of the ozonesonde launching sites from which data were used in this study.

|                         | Location             | Timeframe<br>(in this study)               | Sampling<br>frequency   | Operating<br>network                        |
|-------------------------|----------------------|--------------------------------------------|-------------------------|---------------------------------------------|
| <b>Ascension Island</b> | 7.98°S,<br>14.42°W   | 1998–2010,<br>2016–2018                    | ~ weekly                | SHADOZ/NASA-<br>Goddard                     |
| <b>Eureka</b>           | 79.98°N,<br>85.95°W  | 1991–2018                                  | ~ weekly                | Environment<br>and Climate<br>Change Canada |
| <b>Hilo</b>             | 19.40°N,<br>155.0°W  | 1990–2018                                  | ~ weekly                | SHADOZ/NOAA-<br>GMD                         |
| <b>Lauder</b>           | 45.04°S,<br>169.68°W | 1987–2018                                  | ~ weekly                | NIWA                                        |
| <b>Marambio</b>         | 64.23°S,<br>56.62°W  | 1988–2018                                  | ~ weekly to<br>biweekly | SMNA/FMI                                    |
| <b>Pago-Pago</b>        | 14.23°S,<br>170.56°W | 1995–2018                                  | ~ weekly                | SHADOZ/NOAA-<br>GMD                         |
| <b>Suva</b>             | 18.13°S,<br>112.65°E | 1997–2018 (2006<br>& 2014 missing)         | ~ biweekly              | SHADOZ/NOAA-<br>GMD                         |
| <b>Trinidad Head</b>    | 41.06°N,<br>124.15°W | 1997–2018                                  | ~ weekly                | NOAA GMD                                    |
| <b>Ushuaia</b>          | 54.85°S,<br>68.31°W  | 2008–2012,<br>2012–2018<br>(July–December) | ~ weekly                | SMNA/FMI                                    |

**Table S3** Sensitivity analysis of the 1 km-vertically-binned  $S_{score}$  from 0–12 km between ATom and ozonesonde  $O_3$  distributions at Ascension Island in August. The first variable indicates the distance from the ozonesonde launching site within which ATom data were used to define  $O_3$  distributions. The second variable corresponds to the size of the bin used to compare  $O_3$  distributions. The third variable is the length of the ozonesonde record to which ATom is compared. The first row corresponds to the variables used in this study. In the following rows, the changing variable is indicated in bold.

| $S_{score}$<br>Variables             | Range | Average |
|--------------------------------------|-------|---------|
| <b>500 km, 5 ppbv, full record</b>   | 21–61 | 42      |
| <b>250 km</b> , 5 ppbv, full record  | 21–68 | 36      |
| <b>1000 km</b> , 5 ppbv, full record | 40–66 | 50      |
| 500 km, <b>2 ppbv</b> , full record  | 15–53 | 34      |
| 500 km, <b>10 ppbv</b> , full record | 32–66 | 48      |
| 500 km, 5 ppbv, <b>2 years</b>       | 15–62 | 40      |
| 500 km, 5 ppbv, <b>8 years</b>       | 20–63 | 42      |

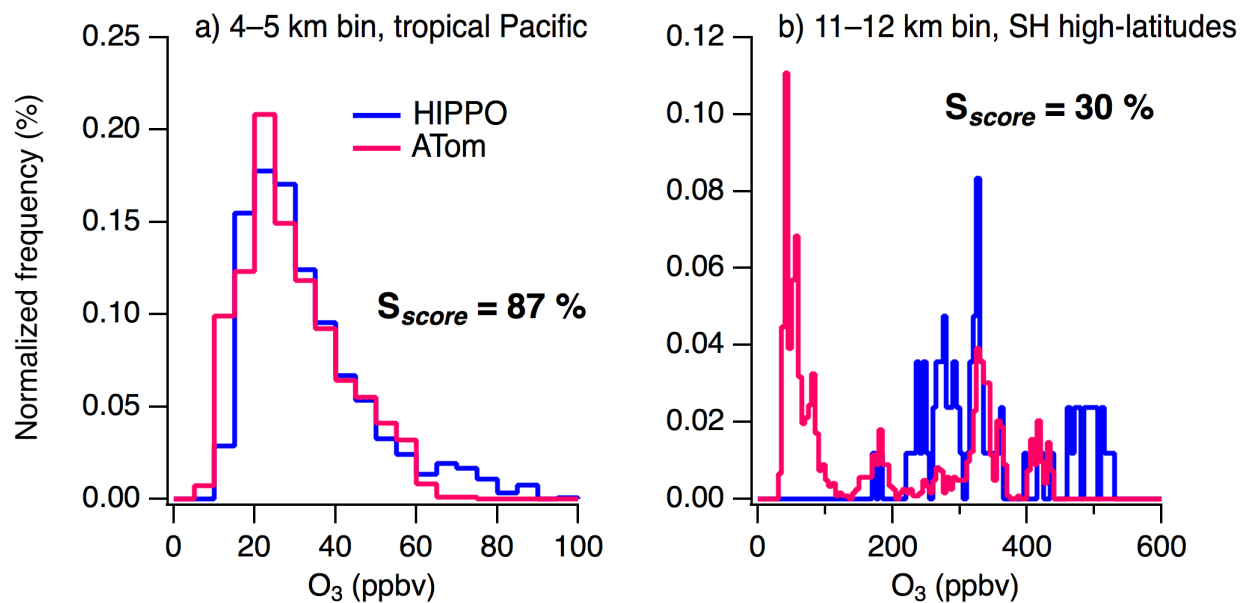

**Figure S1** Two illustrations of the Skill Score ( $S_{score}$ ), a metric used in this study to quantify the overlap of O<sub>3</sub> distributions. Here are shown in a) a high  $S_{score}$  between HIPPO (blue) and ATom (pink) from 4 to 5 km in the tropical Pacific, and b) a low  $S_{score}$  between HIPPO (blue) and ATom (pink) from 11 to 12 km in the high-latitudes of the Southern Hemisphere.

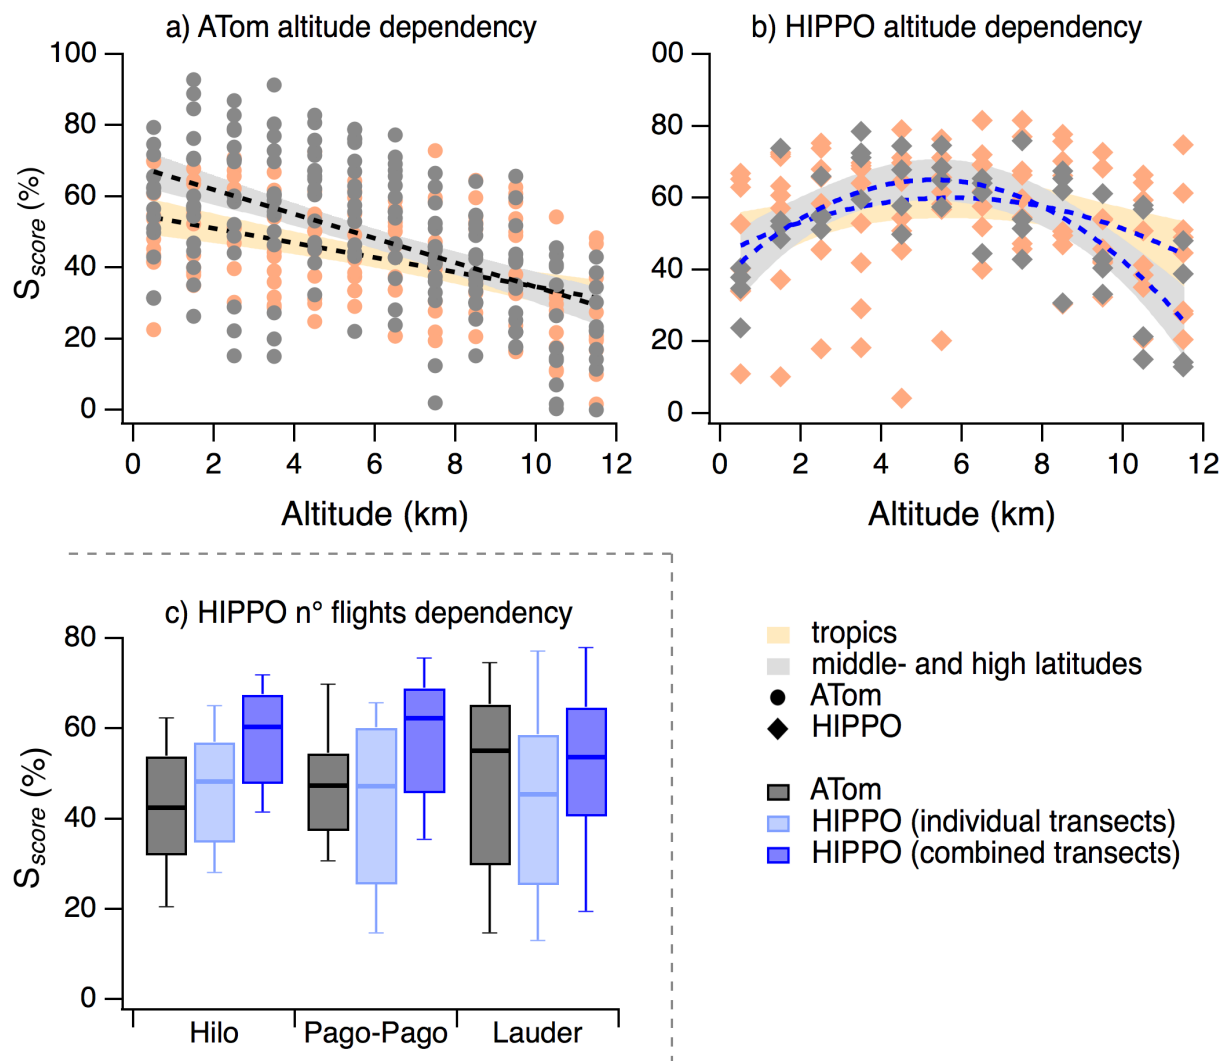

**Figure S2**  $S_{score}$  correlation with altitude for a) ATom (circles) vs. ozonesonde comparison, and b) HIPPO (diamonds) vs. ozonesonde comparison. The comparison is split between the tropics (orange) and the extra-tropics (grey) to show the increased dependency with altitude of the  $S_{score}$  in the extra-tropics. In c) is shown the distribution of the  $S_{score}$  values between ATom and ozonesondes (in black), HIPPO (comparing the northbound and southbound transects individually) and ozonesondes (in light blue), and HIPPO (comparing the combined northbound and southbound transects) and ozonesondes (in dark blue).

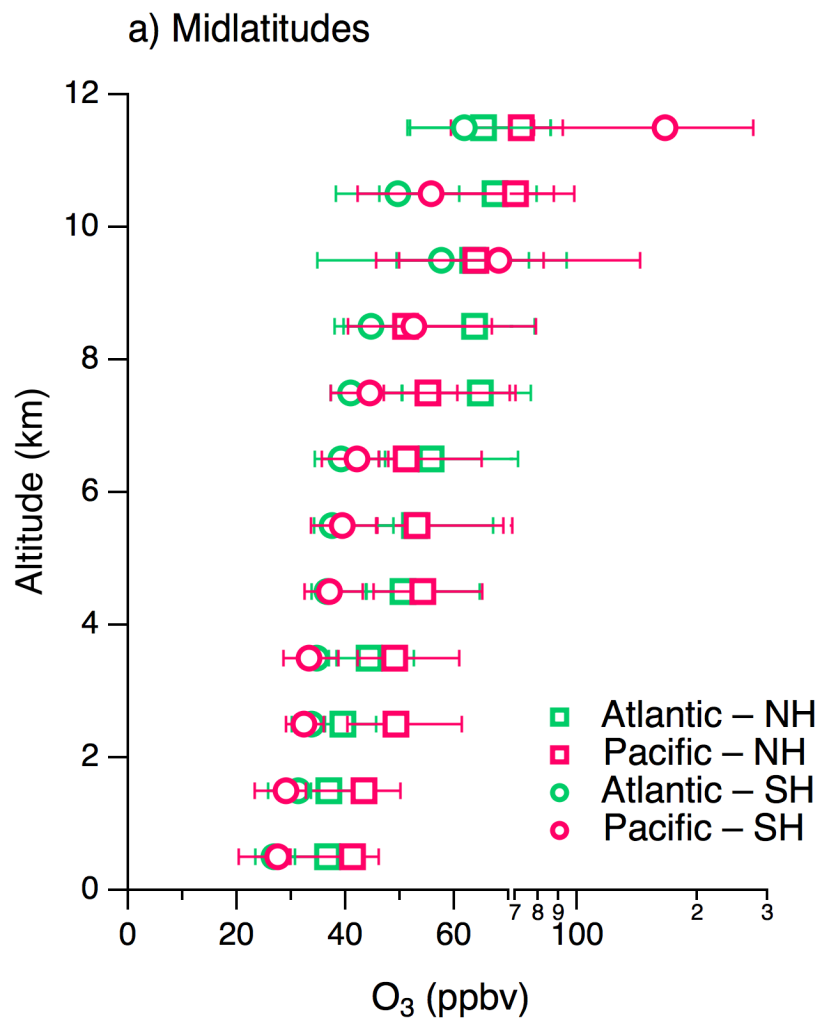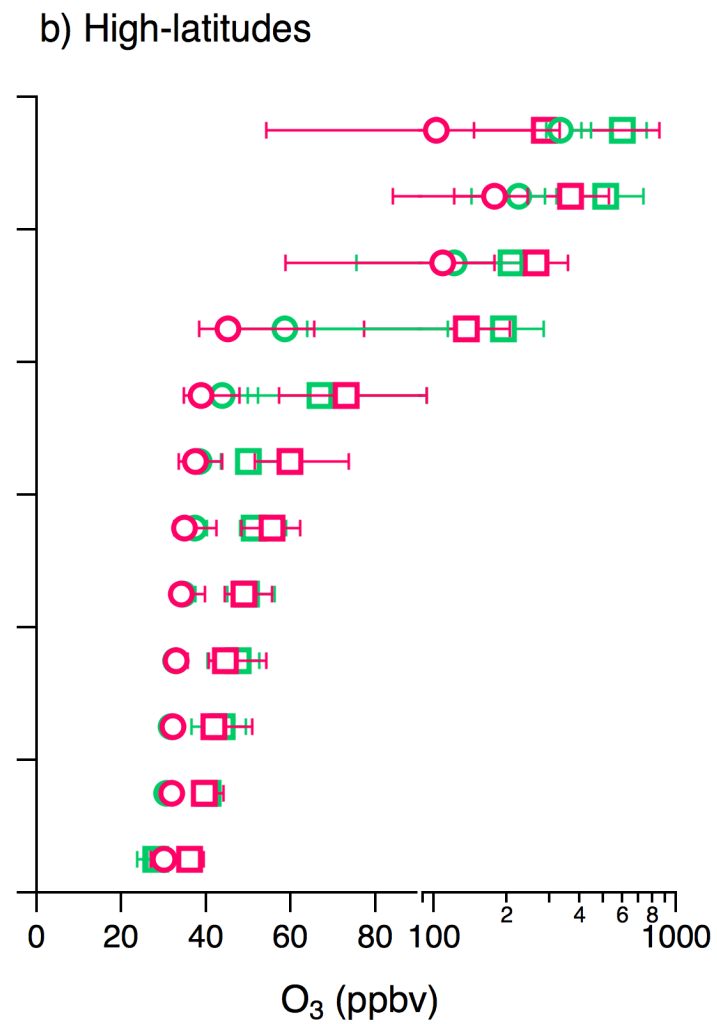

**Figure S3** Inter-hemispheric comparison of tropospheric O<sub>3</sub> distribution in a) the mid latitudes and b) the high latitudes, both in the Pacific (pink) and in the Atlantic (green). The NH is delineated by the squares, and the SH is delineated by the circles. The x-axes start with linear scales then switch to a logarithmic scale in both panels.



a) 8 – 12 km

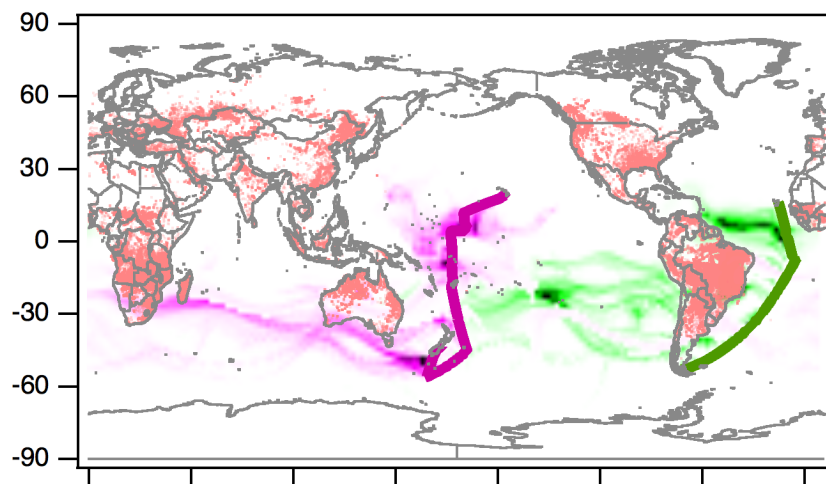

b) 2 – 8 km

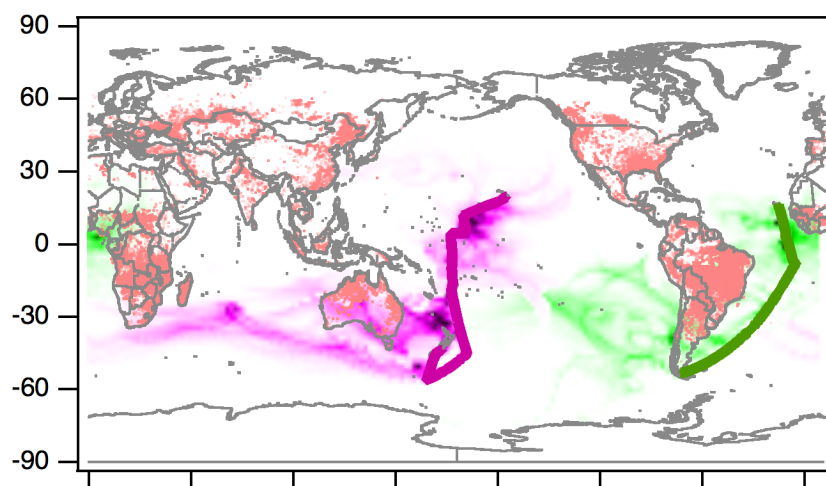

c) 0 – 2 km

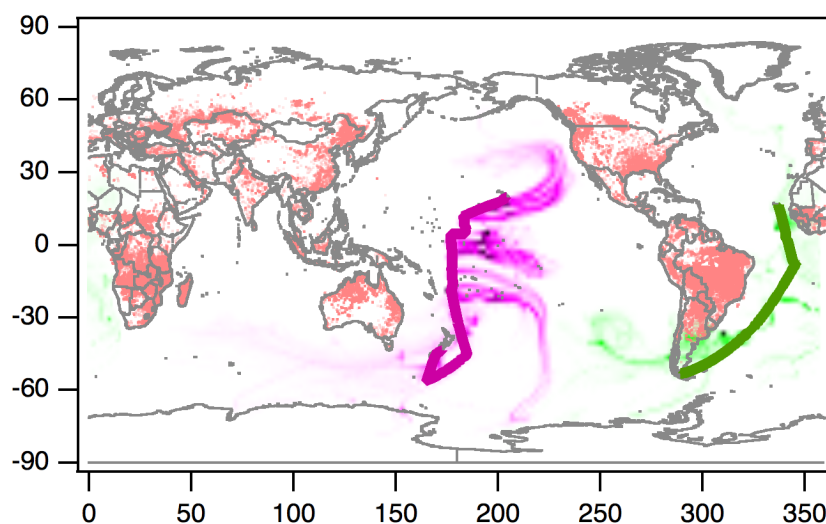

**Figure S4** Modeled 10 days back trajectories for ATom in October (ATom-3) for different altitude levels corresponding to a) 0 – 2 km, b) 2 – 8 km, and c) 8 – 12 km. The red dots on the map are fire counts in October 2017 from MODIS.

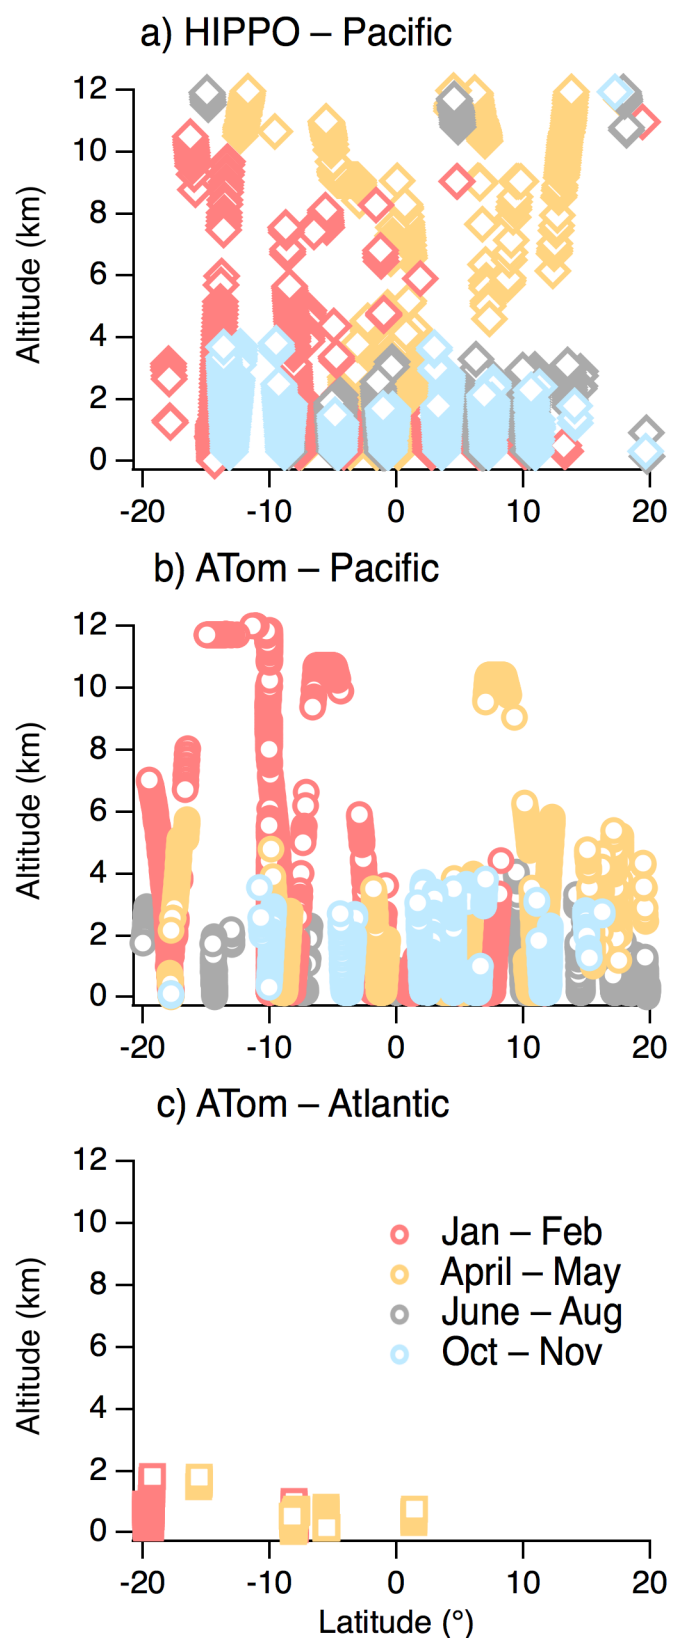

**Figure S5** Occurrences of low  $O_3$  (< 15 ppbv) in the tropical oceans during a) HIPPO in diamonds, b) ATom (Pacific) in circles, and c) ATom (Atlantic) in squares. The seasonal deployments are delineated by the colors, as shown in the legend.

a) Winter

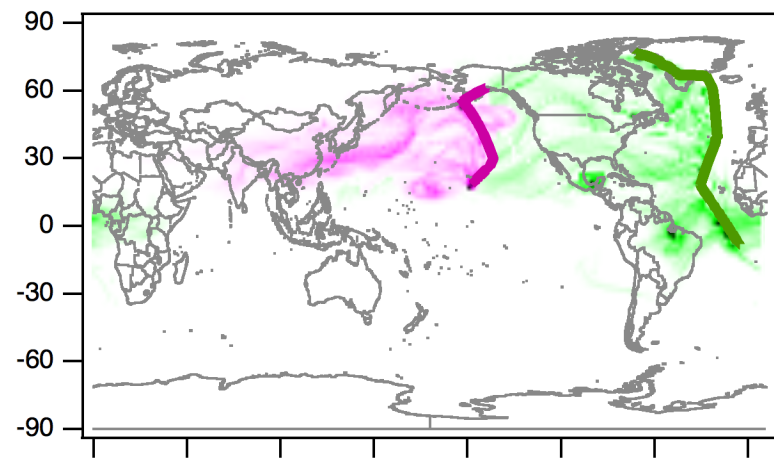

b) Spring

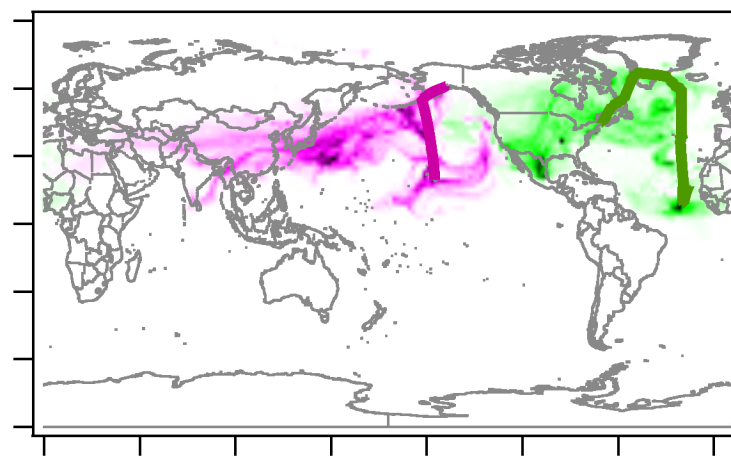

c) Summer

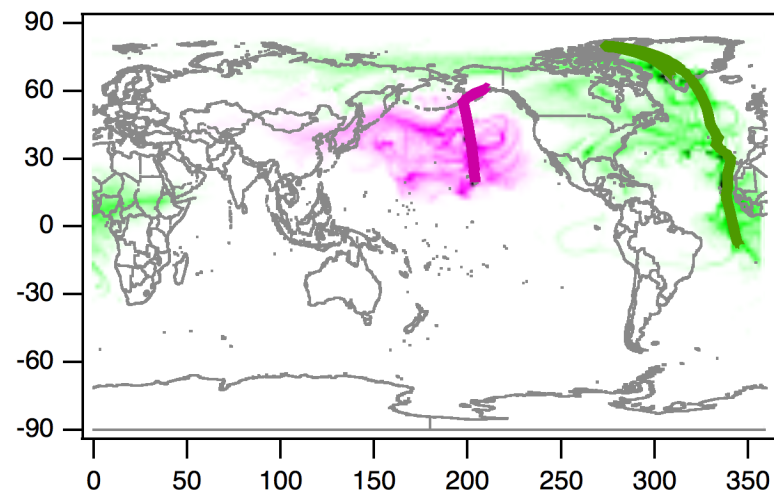

d) Fall

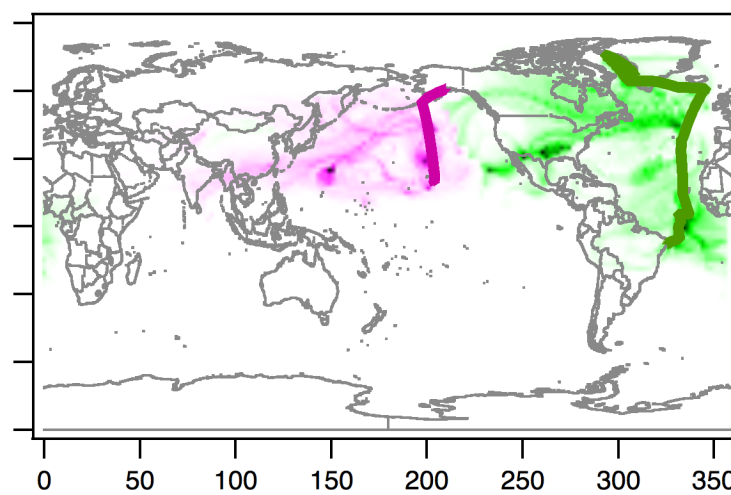

**Figure S6** Modeled 10 days back trajectories for ATom 1–4 corresponding to a) boreal winter, b) boreal spring, c) boreal summer, and d) boreal fall.
